# Supplementary material for: On the Precise Tuning of Optical Filtering Features in Nanoporous Anodic Alumina Distributed Bragg Reflectors
Source: Springer Nature journal article supplement (doi:10.1038/s41598-018-22895-5), 2018-03-09
Supplement: 41598_2018_22895_MOESM1_ESM.pdf [file 41598_2018_22895_MOESM1_ESM.pdf]

# Supporting Information

**On the Precise Tuning of Optical Filtering Features in Nanoporous  
Anodic Alumina Distributed Bragg Reflectors**

**Cheryl Suwen Law<sup>1,2,3</sup>, Siew Yee Lim<sup>1,2,3</sup>, and Abel Santos<sup>1,2,3\*</sup>**

<sup>1</sup>School of Chemical Engineering, The University of Adelaide, Adelaide, SA 5005, Australia

<sup>2</sup>Institute for Photonics and Advanced Sensing (IPAS), The University of Adelaide, 5005 Adelaide, Australia

<sup>3</sup>ARC Centre of Excellence for Nanoscale BioPhotonics (CNBP), The University of Adelaide, 5005 Adelaide, Australia

\*E-Mail: [abel.santos@adelaide.edu.au](mailto:abel.santos@adelaide.edu.au)

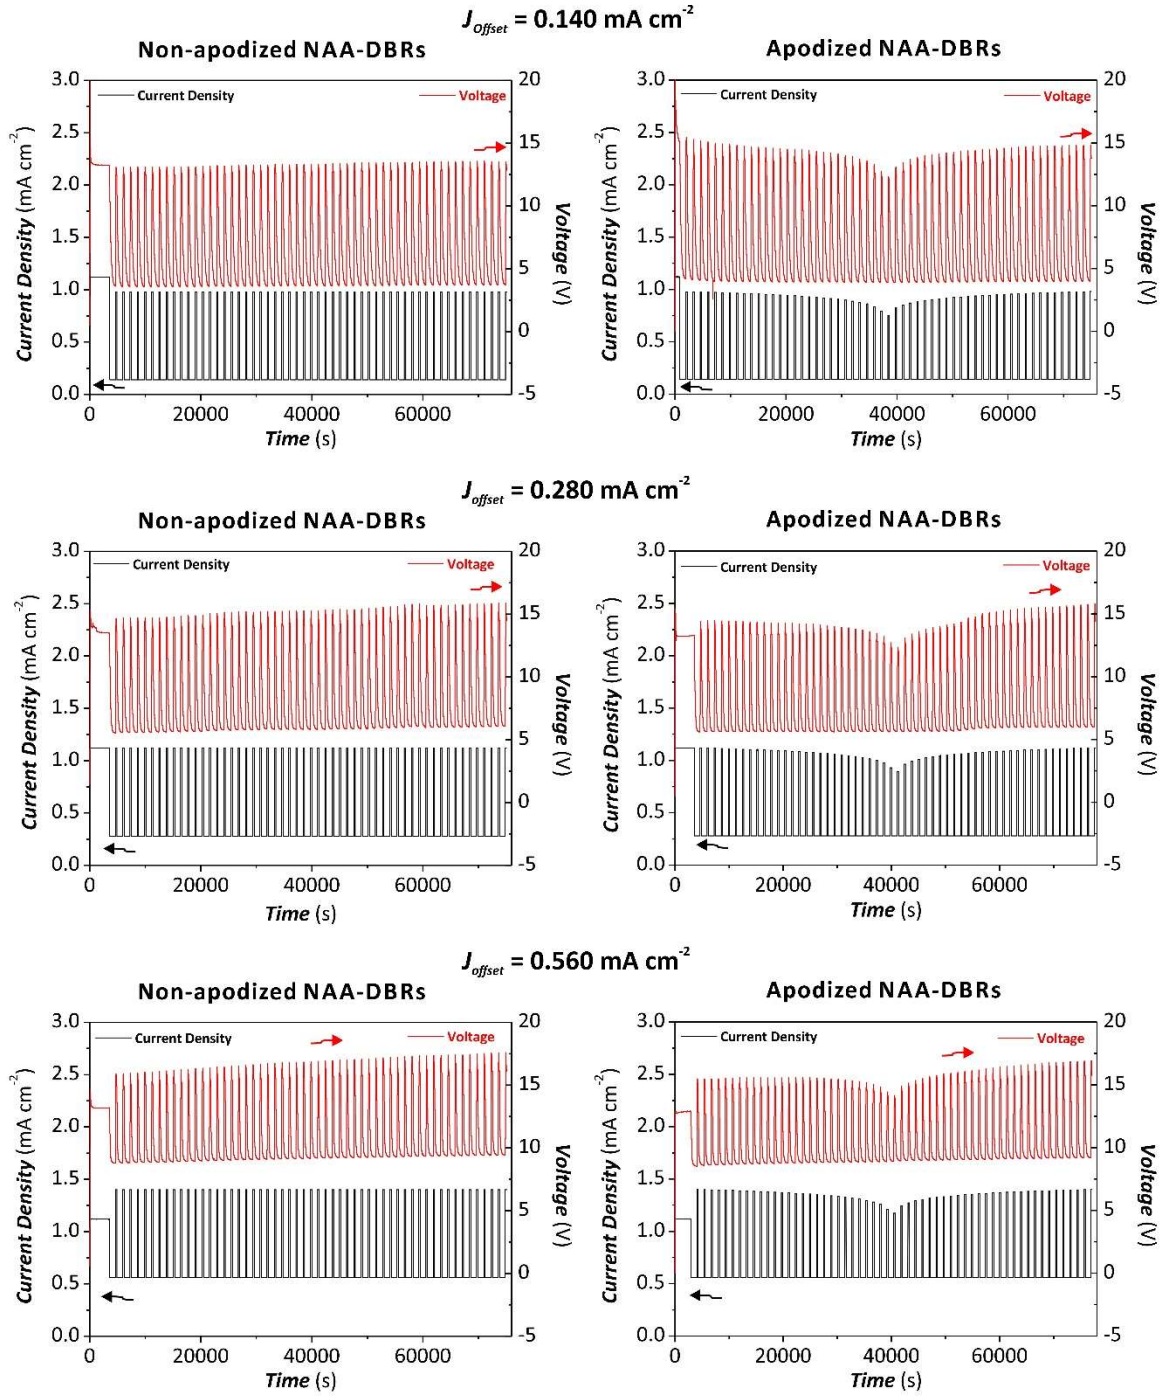

**Figure S1.** Anodization profiles of non-apodized and logarithmic negative apodized NAA-DBRs as a function of  $J_{\text{offset}}$ .

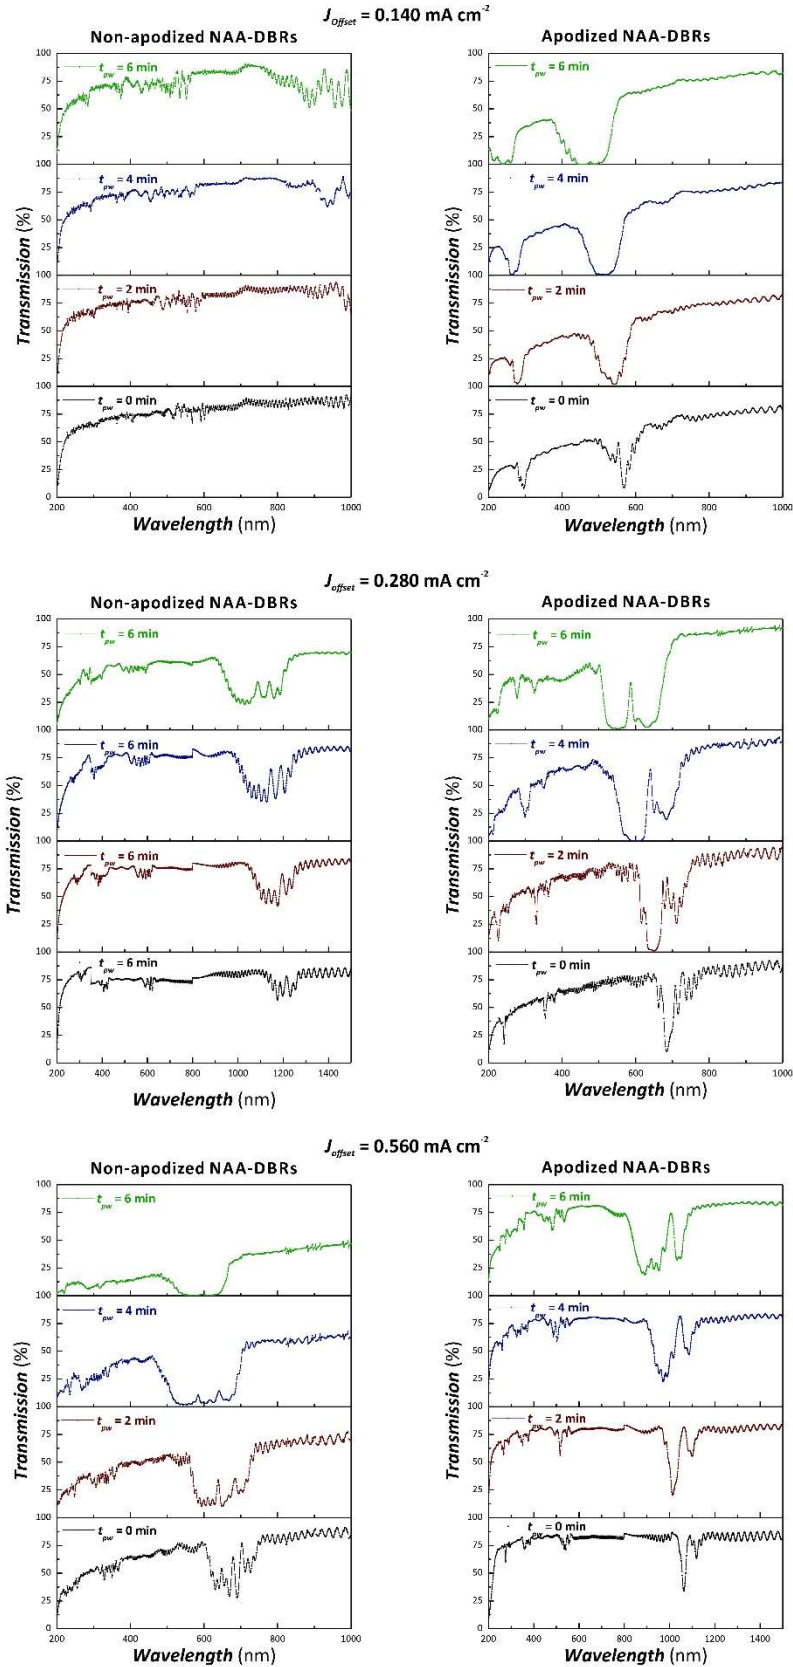

Figure S2. Transmission spectra of non-apodized and logarithmic negative apodized NAA-DBRs as a function of  $J_{Offset}$  and  $t_{pw}$ .

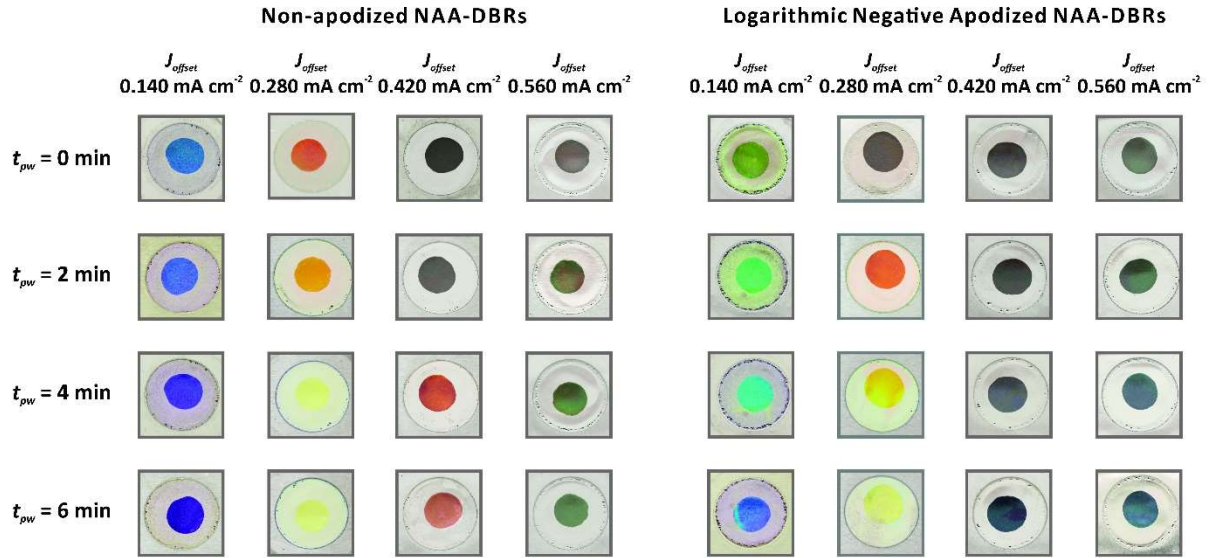

**Figure S3.** Digital pictures of non-apodized and logarithmic negative apodized NAA-DBRs as a function of  $J_{offset}$  and  $t_{pw}$ .

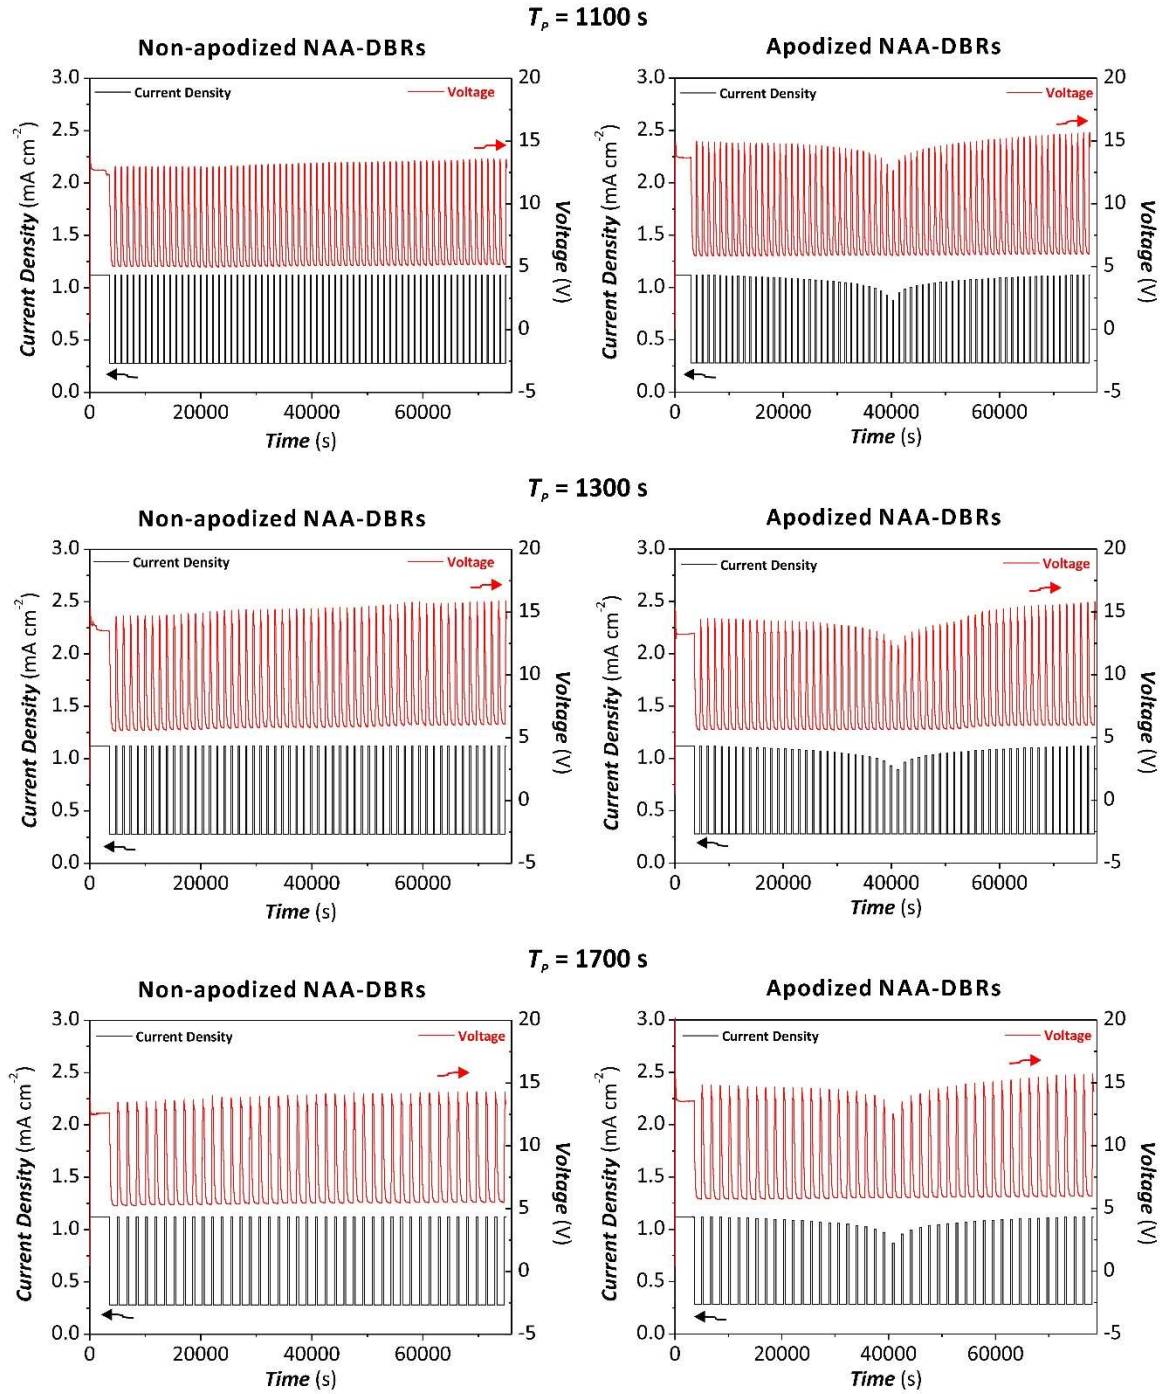

**Figure S4.** Anodization profiles of non-apodized and logarithmic negative apodized NAA-DBRs as a function of  $T_p$ .



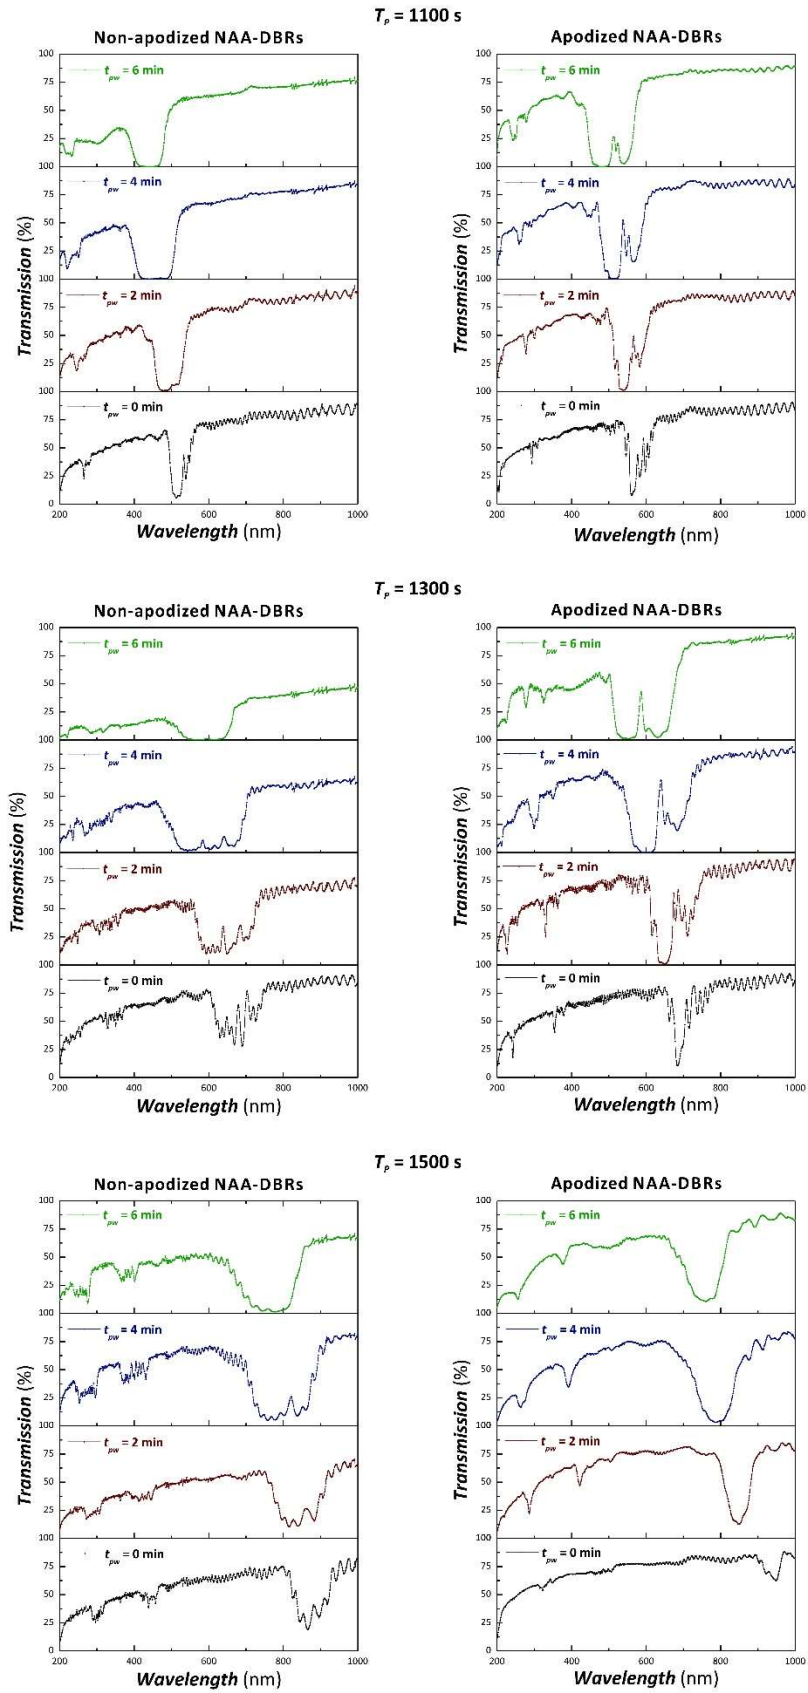

Figure S5. Transmission spectra of non-apodized and logarithmic negative apodized NAA-DBRs as a function of  $T_p$  and  $t_{pw}$ .

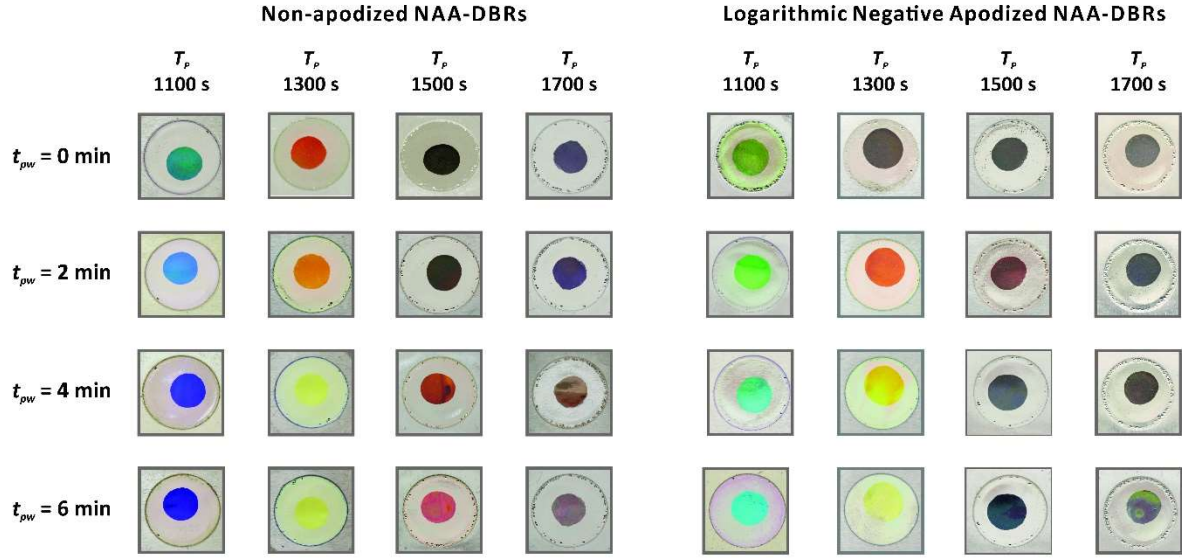

**Figure S6.** Digital pictures of non-apodized and logarithmic negative apodized NAA-DBRs as a function of  $T_p$  and  $t_{pw}$ .

The amplitudes as a function of time for the corresponding apodization functions applied in this study are given as **Equations S1 - S8**:

**(i) Linear positive apodization**

For  $t \leq t_{an}/2$

$$A(t)_J = A_{min} + \left( \frac{A_{max} - A_{min}}{\frac{t_{an}}{2}} \right) \cdot t \quad \text{Eq. S1}$$

For  $t > t_{an}/2$

$$A(t)_J = A_{min} + \left( \frac{A_{max} - A_{min}}{t_{an} - \frac{t_{an}}{2}} \right) \cdot (t_{an} - t) \quad \text{Eq. S2}$$

**(ii) Linear negative apodization**

For  $t \leq t_{an}/2$

$$A(t)_J = A_{max} - \left( \frac{A_{max} - A_{min}}{\frac{t_{an}}{2}} \right) \cdot t \quad \text{Eq. S3}$$

For  $t > t_{an}/2$

$$A(t)_J = A_{max} + \left( \frac{A_{min} - A_{max}}{t_{an} - \frac{t_{an}}{2}} \right) \cdot (t - t_{an}) \quad \text{Eq. S4}$$

**(iii) Logarithmic positive apodization**

For  $t \leq t_{an}/2$

$$A(t)_J = A_{min} + \left( \frac{A_{max} - A_{min}}{\log\left(\frac{t_{an}}{2} + 10\right) - 1} \right) \cdot (\log(t + 10) - 1) \quad \text{Eq. S5}$$

For  $t > t_{an}/2$

$$A(t)_J = \left( \frac{A_{min} - A_{max}}{\log(t_{an} + 10) - \log\left(\frac{t_{an}}{2} + 10\right)} \right) \cdot (\log(t + 10) - \log\left(\frac{t_{an}}{2} + 10\right)) + A_{max} \quad \text{Eq. S6}$$

**(iv) Logarithmic negative apodization**

For  $t \leq t_{an}/2$

$$A(t)_J = A_{max} + \left( \frac{A_{min} - A_{max}}{\log\left(\frac{t_{an}}{2} + 10\right) - 1} \right) \cdot (\log(t + 10) - 1) \quad \text{Eq. S7}$$

For  $t > t_{an}/2$

$$A(t)_J = \left( \frac{A_{max} - A_{min}}{\log(t_{an} + 10) - \log\left(\frac{t_{an}}{2} + 10\right)} \right) \cdot (\log(t + 10) - \log\left(\frac{t_{an}}{2} + 10\right)) + A_{min} \quad \text{Eq. S8}$$
